# Supplementary material for: Creating the Appalachian Woman: An Anthology of Appalachian Women Writers, 1865-1884.
Source: Frontiers journal article supplement (doi:10.3389/fonc.2022.920709), 2005-01-01
Supplement: Data_Sheet_1.pdf [file Data_Sheet_1.pdf]

## Supplementary Material

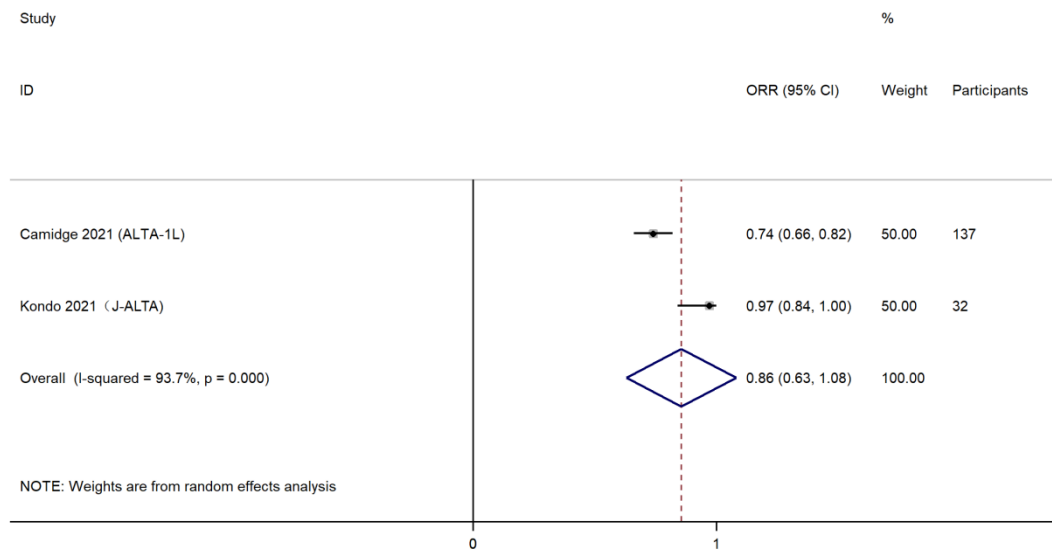

**Supplemental Figure 1.** Forest plot of objective response rate (ORR) among patients who received brigatinib as first-line treatment.

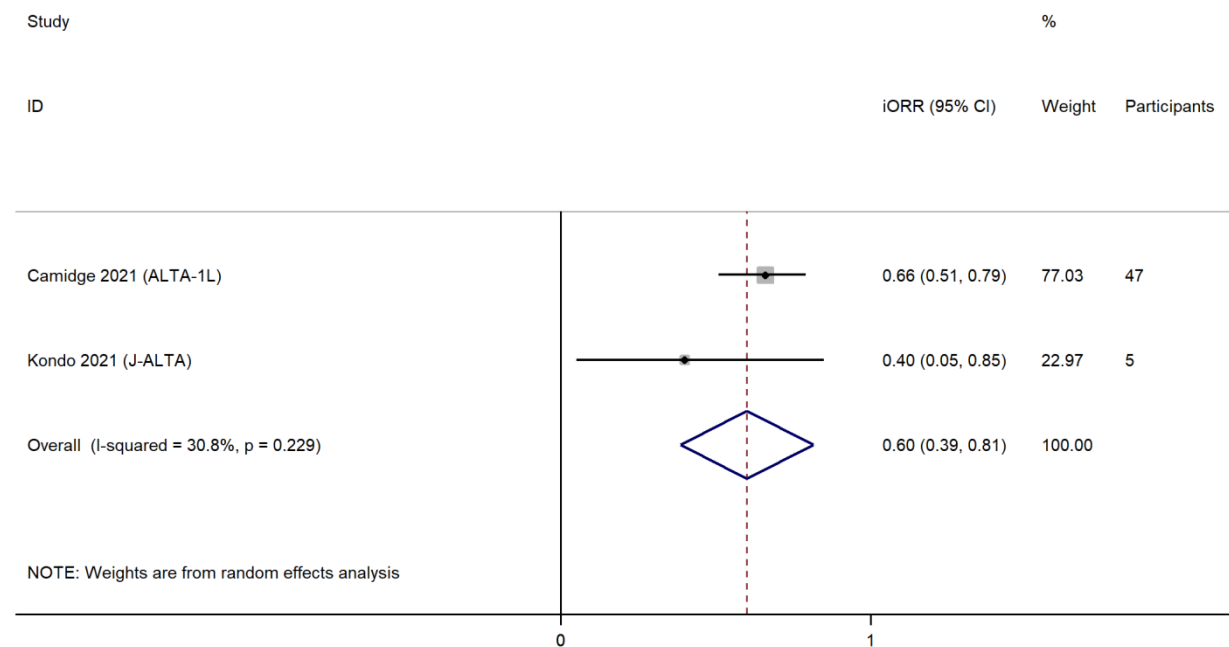

**Supplemental Figure 2.** Forest plot of intracranial objective response rate (iORR) among patients who received brigatinib as first-line treatment.

(3A)

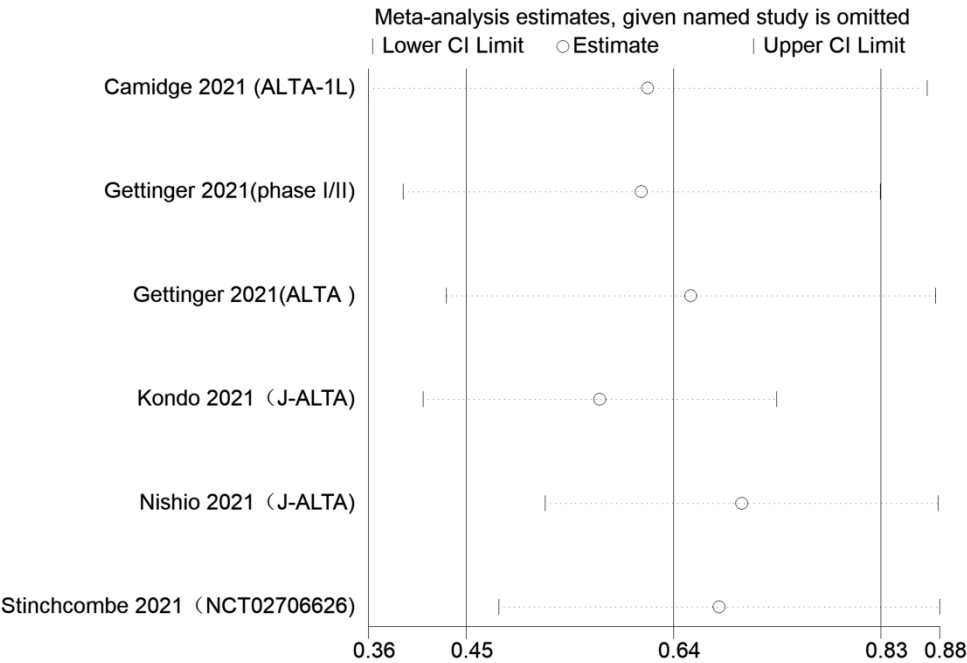

(3B)

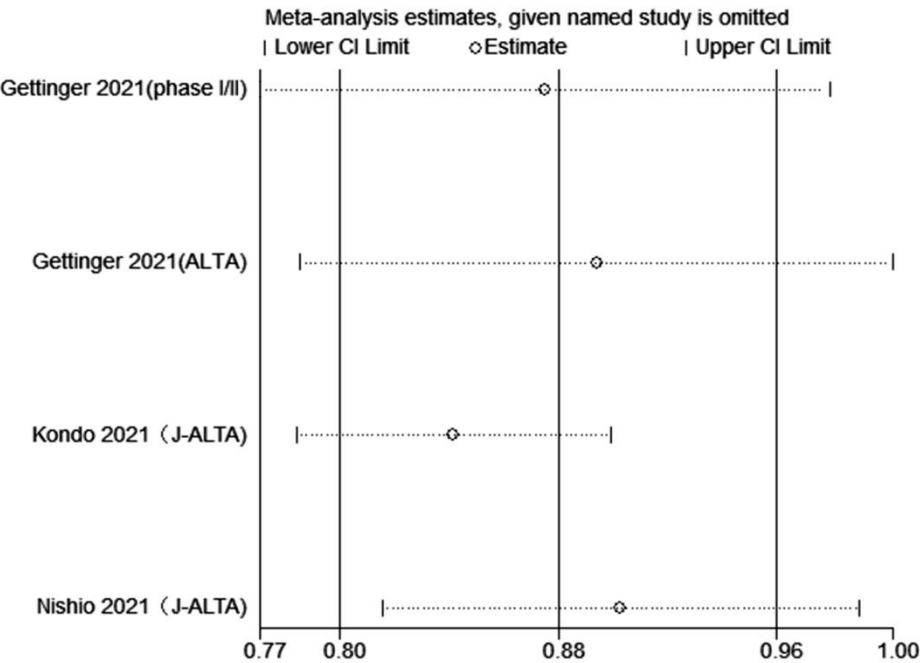

(3C)

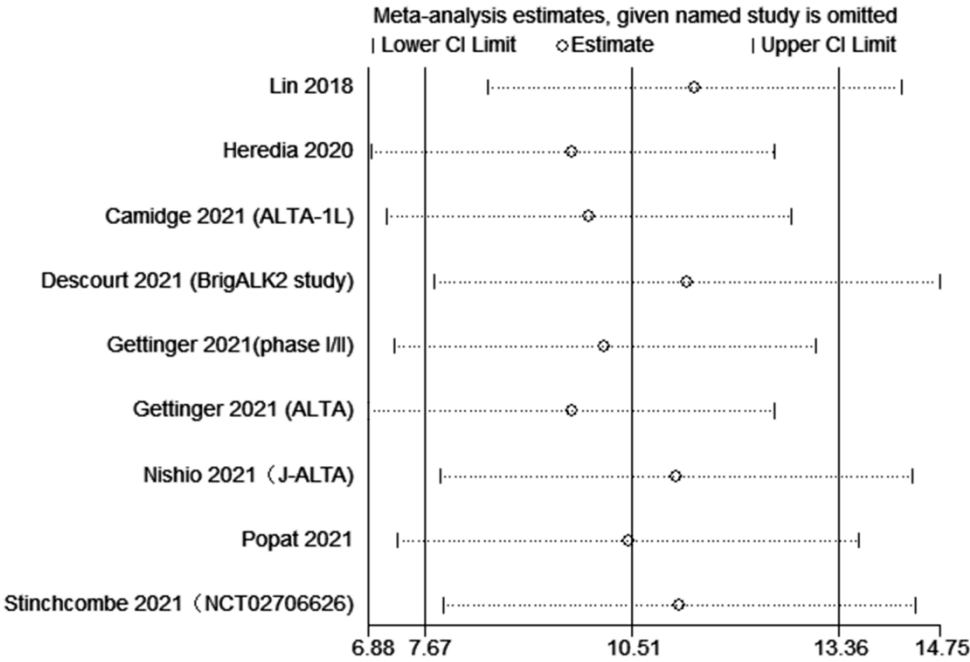

**Supplemental Figure 3.** A, Sensitivity analysis of objective response rate (ORR); B, Sensitivity analysis of disease control rate (DCR); C, Sensitivity analysis of progression free survival (PFS).

(4A)

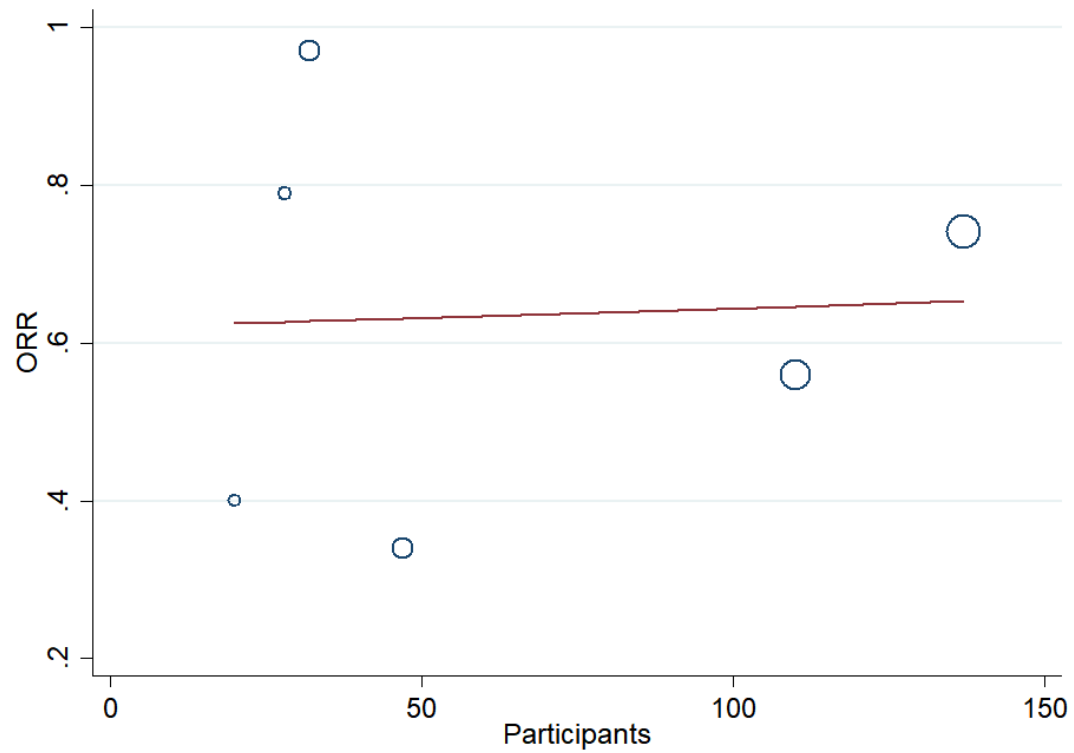

Meta-regression  
**REML** estimate of between-study variance  
 % residual variation due to heterogeneity  
 Proportion of between-study variance explained  
**With** Knapp-Hartung modification

Number of obs = **6**  
 tau2 = **.06782**  
 I-squared\_res = **93.41%**  
 Adj R-squared = **-28.18%**

| orr          | Coef.    | Std. Err. | t    | P> t  | [95% Conf. Interval] |          |
|--------------|----------|-----------|------|-------|----------------------|----------|
| participants | .0002471 | .0024537  | 0.10 | 0.925 | -.0065654            | .0070595 |
| _cons        | .6192675 | .1924284  | 3.22 | 0.032 | .0850005             | 1.153535 |

**(4B)**

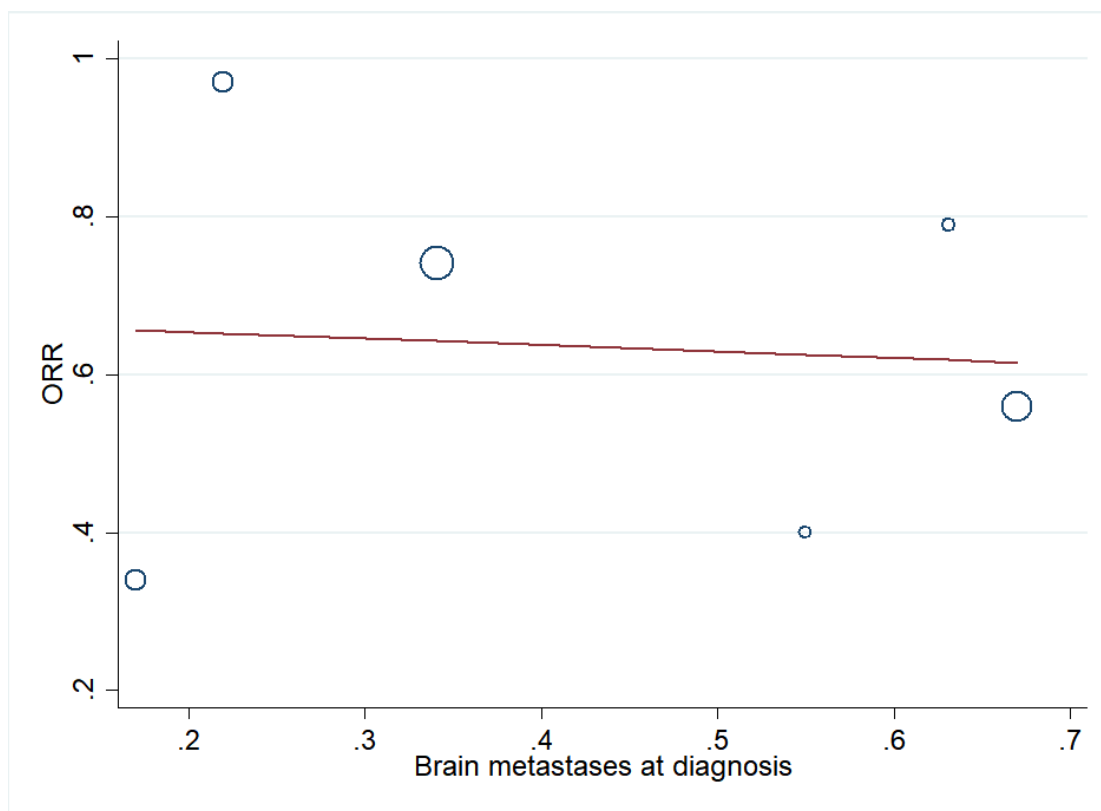

|                                                |               |           |         |       |                      |          |
|------------------------------------------------|---------------|-----------|---------|-------|----------------------|----------|
| Meta-regression                                | Number of obs | =         | 6       |       |                      |          |
| REML estimate of between-study variance        | tau2          | =         | .06733  |       |                      |          |
| % residual variation due to heterogeneity      | I-squared_res | =         | 93.21%  |       |                      |          |
| Proportion of between-study variance explained | Adj R-squared | =         | -27.24% |       |                      |          |
| With Knapp-Hartung modification                |               |           |         |       |                      |          |
| orr                                            | Coef.         | Std. Err. | t       | P> t  | [95% Conf. Interval] |          |
| brainmetastasesatdiagnosis                     | -.0821656     | .5592249  | -0.15   | 0.890 | -1.634823            | 1.470492 |
| _cons                                          | .670191       | .2628434  | 2.55    | 0.063 | -.0595793            | 1.399961 |

**Supplemental Figure 4.** A, Meta-regression analysis for heterogeneity of objective response rate (ORR) regarding sample size; B; Meta-regression analysis for heterogeneity of objective response rate (ORR) regarding brain metastases.

(5A)

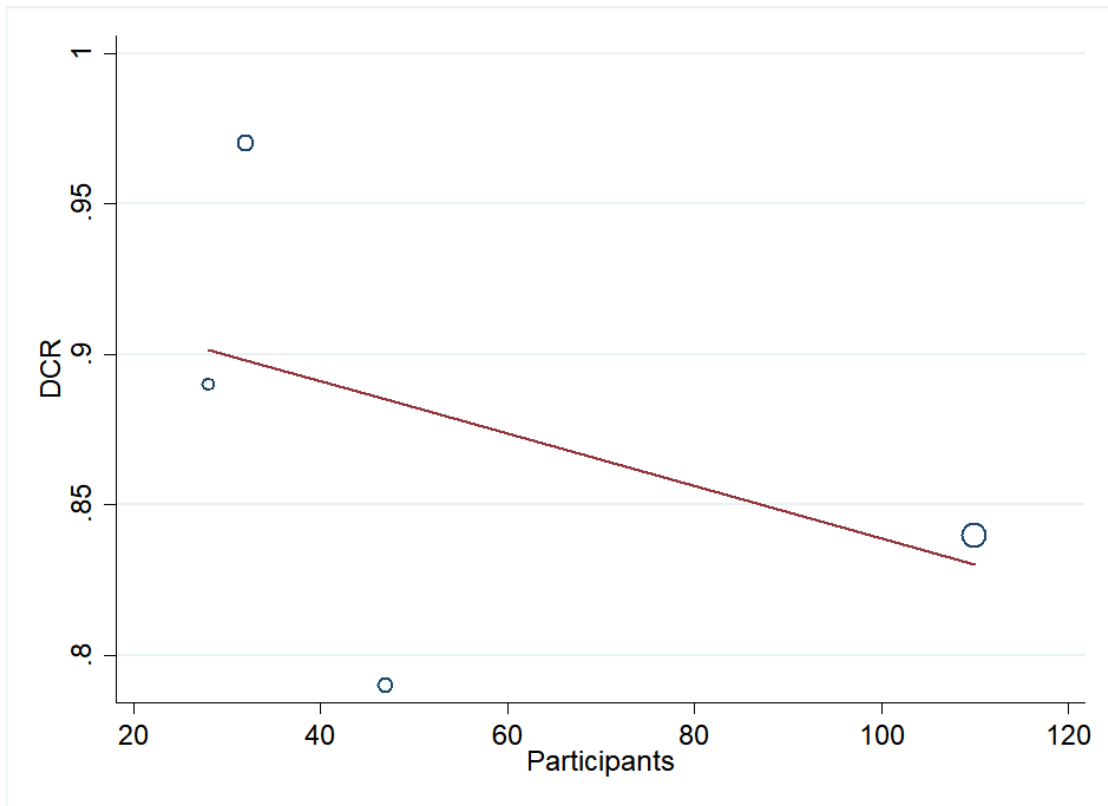

Meta-regression

REML estimate of between-study variance

% residual variation due to heterogeneity

Proportion of between-study variance explained

With Knapp-Hartung modification

Number of obs = 4

tau2 = .002547

I-squared\_res = 27.81%

Adj R-squared = -96.14%

| dcr          | Coef.     | Std. Err. | t     | P> t  | [95% Conf. Interval] |          |
|--------------|-----------|-----------|-------|-------|----------------------|----------|
| participants | -.0008715 | .0011434  | -0.76 | 0.526 | -.0057913            | .0040483 |
| _cons        | .9260117  | .0836344  | 11.07 | 0.008 | .566162              | 1.285861 |

(5B)

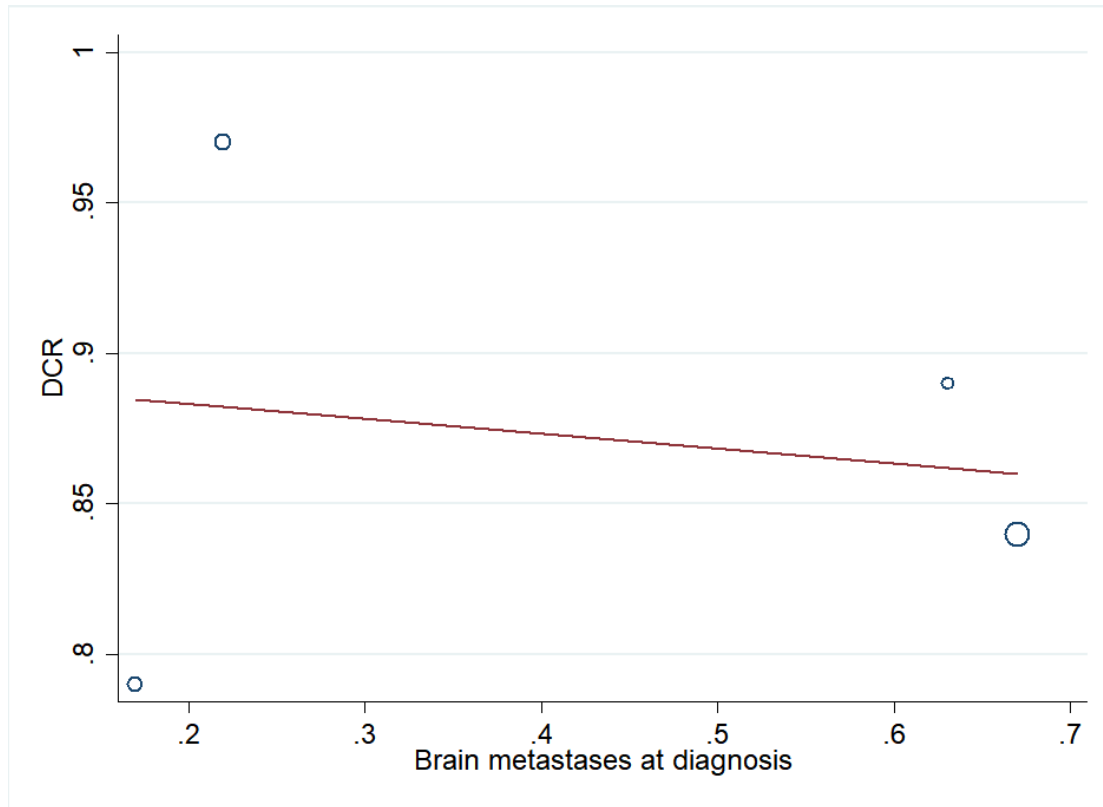

|                                                |               |           |          |       |                      |          |
|------------------------------------------------|---------------|-----------|----------|-------|----------------------|----------|
| Meta-regression                                | Number of obs | =         | 4        |       |                      |          |
| REML estimate of between-study variance        | tau2          | =         | .003883  |       |                      |          |
| % residual variation due to heterogeneity      | I-squared_res | =         | 43.41%   |       |                      |          |
| Proportion of between-study variance explained | Adj R-squared | =         | -199.04% |       |                      |          |
| With Knapp-Hartung modification                |               |           |          |       |                      |          |
| dcr                                            | Coef.         | Std. Err. | t        | P> t  | [95% Conf. Interval] |          |
| brainmetastasesatdiagnosis                     | -.0495535     | .1985982  | -0.25    | 0.826 | -.9040524            | .8049454 |
| _cons                                          | .8931612      | .0989432  | 9.03     | 0.012 | .4674429             | 1.318879 |

**Supplemental Figure 5.** A, Meta-regression analysis for heterogeneity of disease control rate (DCR) regarding sample size; B; Meta-regression analysis for heterogeneity of disease control rate (DCR) regarding brain metastases.

(6A)

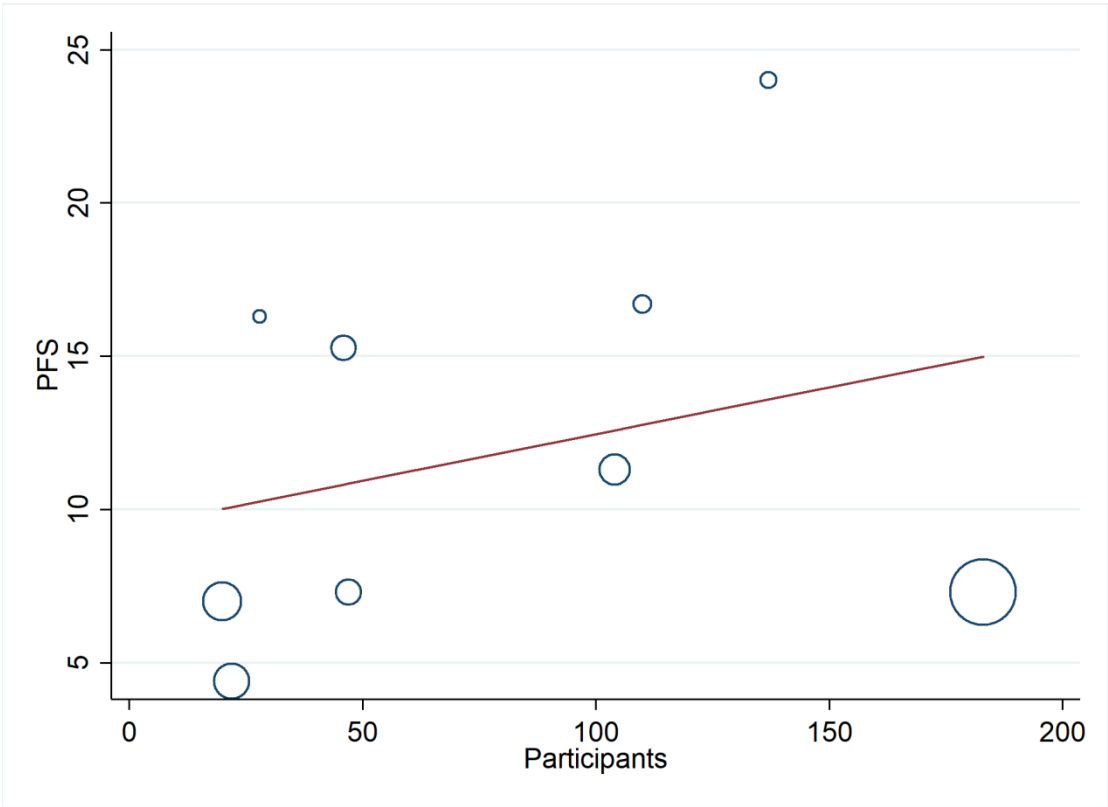

|                                                |          |           |      |       |                      |          |        |
|------------------------------------------------|----------|-----------|------|-------|----------------------|----------|--------|
| Meta-regression                                |          |           |      |       | Number of obs        | =        | 9      |
| REML estimate of between-study variance        |          |           |      |       | tau2                 | =        | 36.35  |
| % residual variation due to heterogeneity      |          |           |      |       | I-squared_res        | =        | 90.75% |
| Proportion of between-study variance explained |          |           |      |       | Adj R-squared        | =        | -7.53% |
| With Knapp-Hartung modification                |          |           |      |       |                      |          |        |
| pfs                                            | Coef.    | Std. Err. | t    | P> t  | [95% Conf. Interval] |          |        |
| participants                                   | .0304864 | .0382823  | 0.80 | 0.452 | -.0600367            | .1210096 |        |
| _cons                                          | 9.406849 | 3.669978  | 2.56 | 0.037 | .7287293             | 18.08497 |        |



(6B)

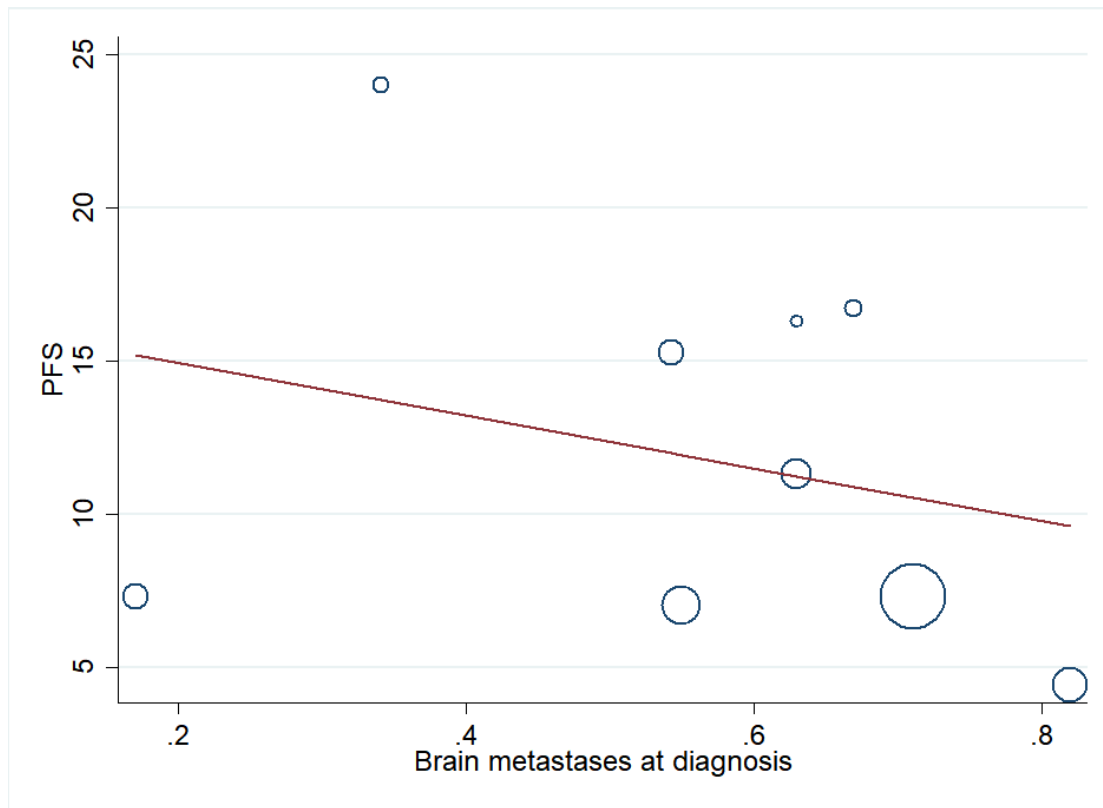

|                                                |           |           |                        |       |                      |
|------------------------------------------------|-----------|-----------|------------------------|-------|----------------------|
| Meta-regression                                |           |           | Number of obs = 9      |       |                      |
| REML estimate of between-study variance        |           |           | tau2 = 36.17           |       |                      |
| % residual variation due to heterogeneity      |           |           | I-squared_res = 89.32% |       |                      |
| Proportion of between-study variance explained |           |           | Adj R-squared = -7.00% |       |                      |
| With Knapp-Hartung modification                |           |           |                        |       |                      |
| pfs                                            | Coef.     | Std. Err. | t                      | P> t  | [95% Conf. Interval] |
| brainmetastasesatdiagnosis                     | -8.580177 | 11.43503  | -0.75                  | 0.478 | -35.61973 18.45937   |
| _cons                                          | 16.63752  | 6.815945  | 2.44                   | 0.045 | .5203719 32.75467    |

**Supplemental Figure 6.** A, Meta-regression analysis for heterogeneity of progression free survival (PFS) regarding sample size; B; Meta-regression analysis for heterogeneity of progression free survival (PFS) regarding brain metastases.

(7A)

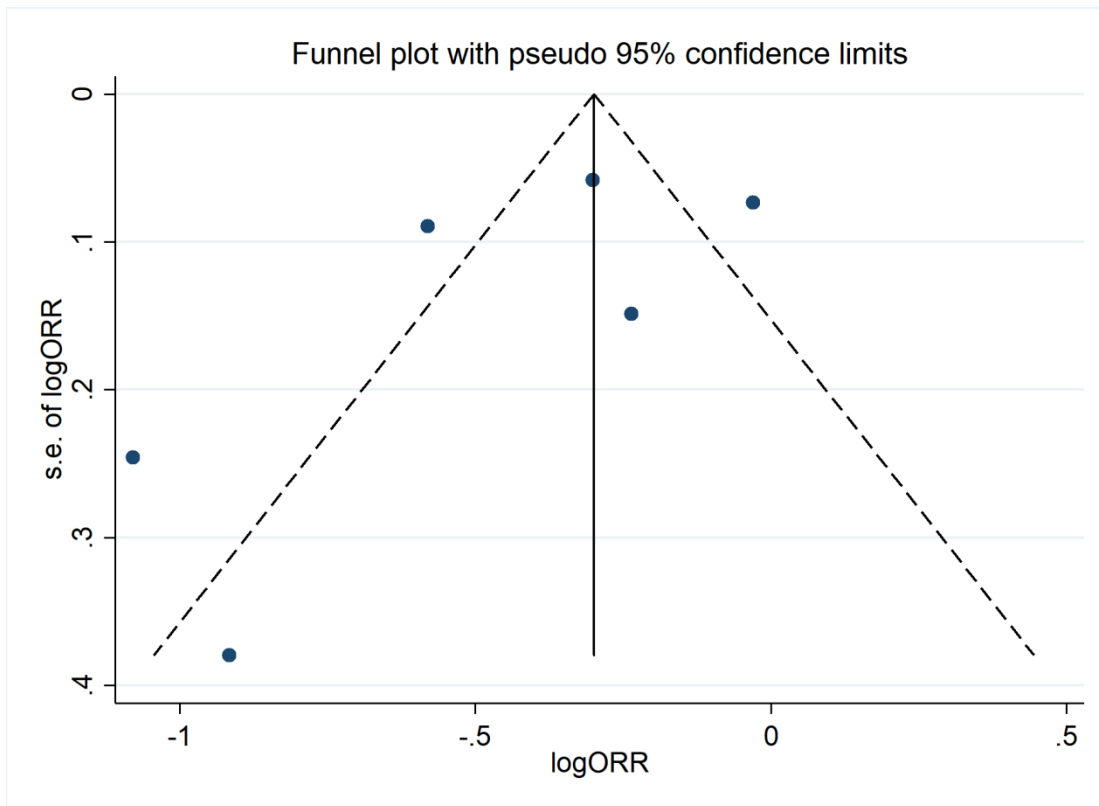

(7B)

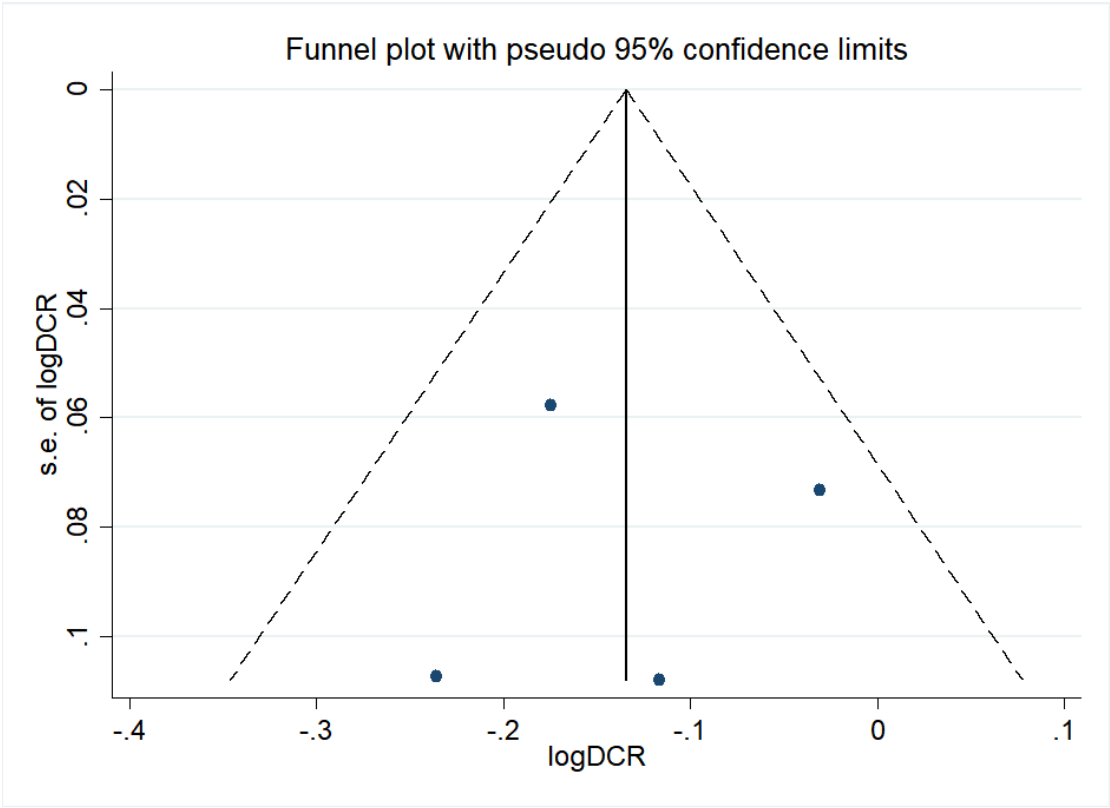

**(7C)**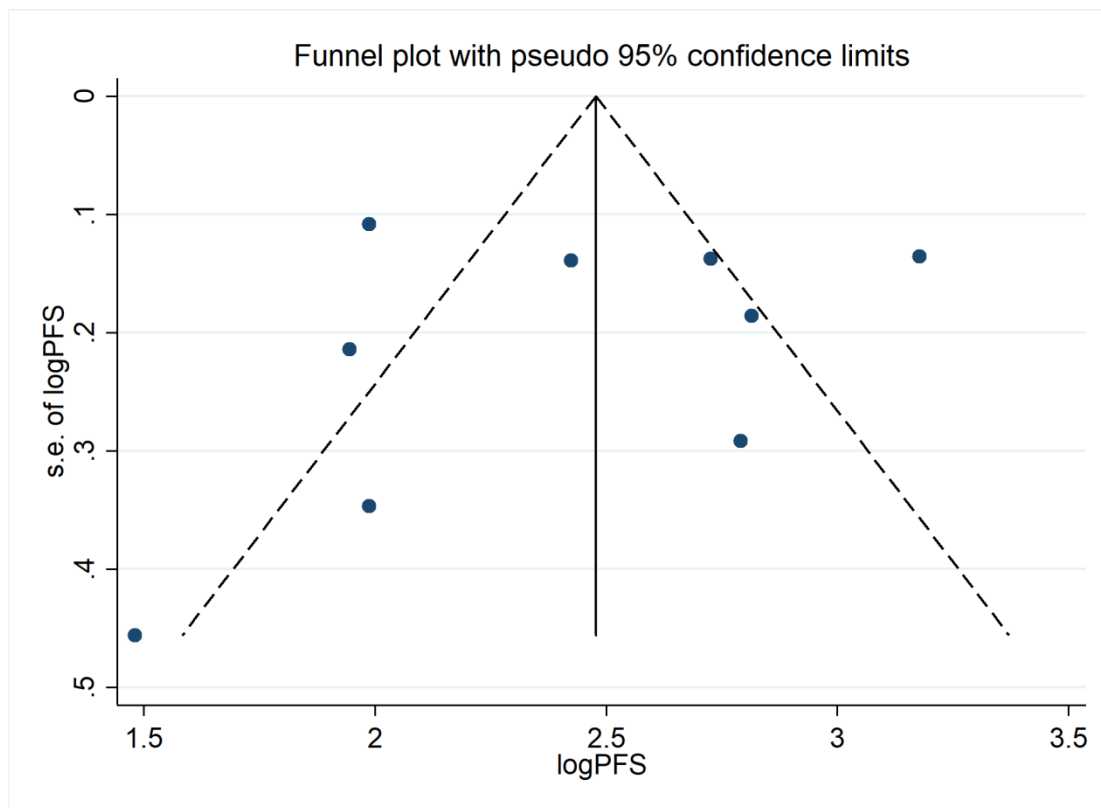**(7D)**

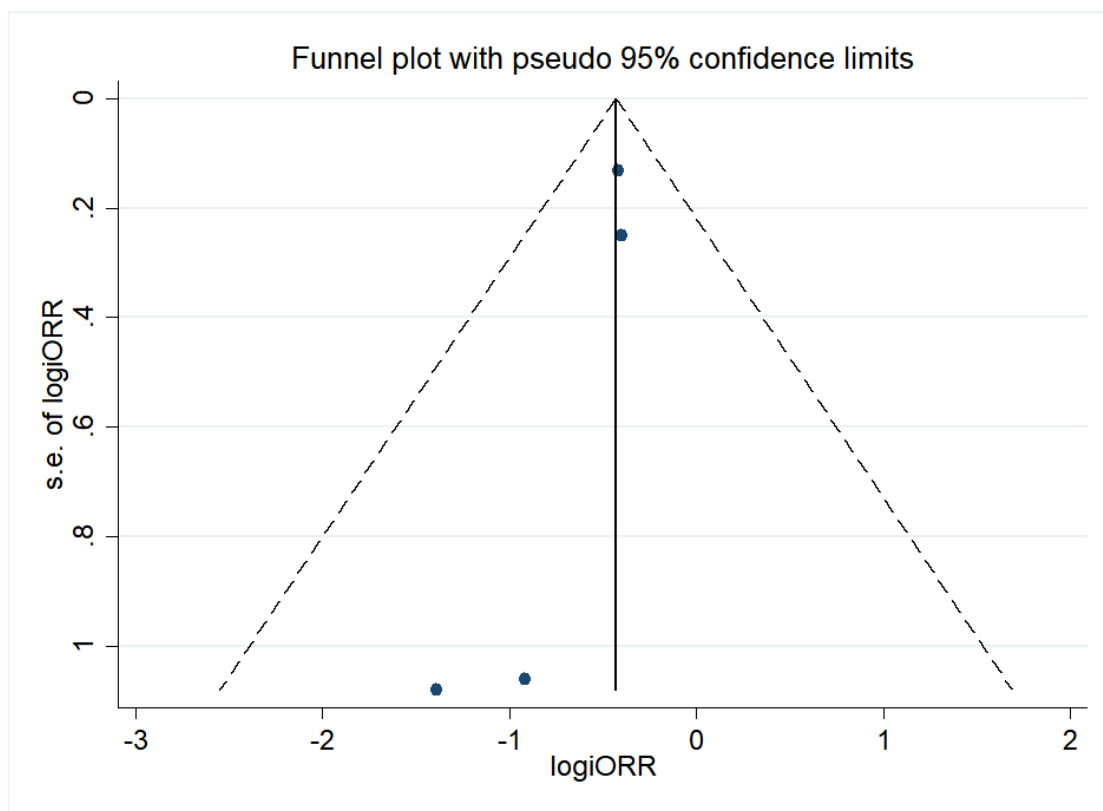

(7E)

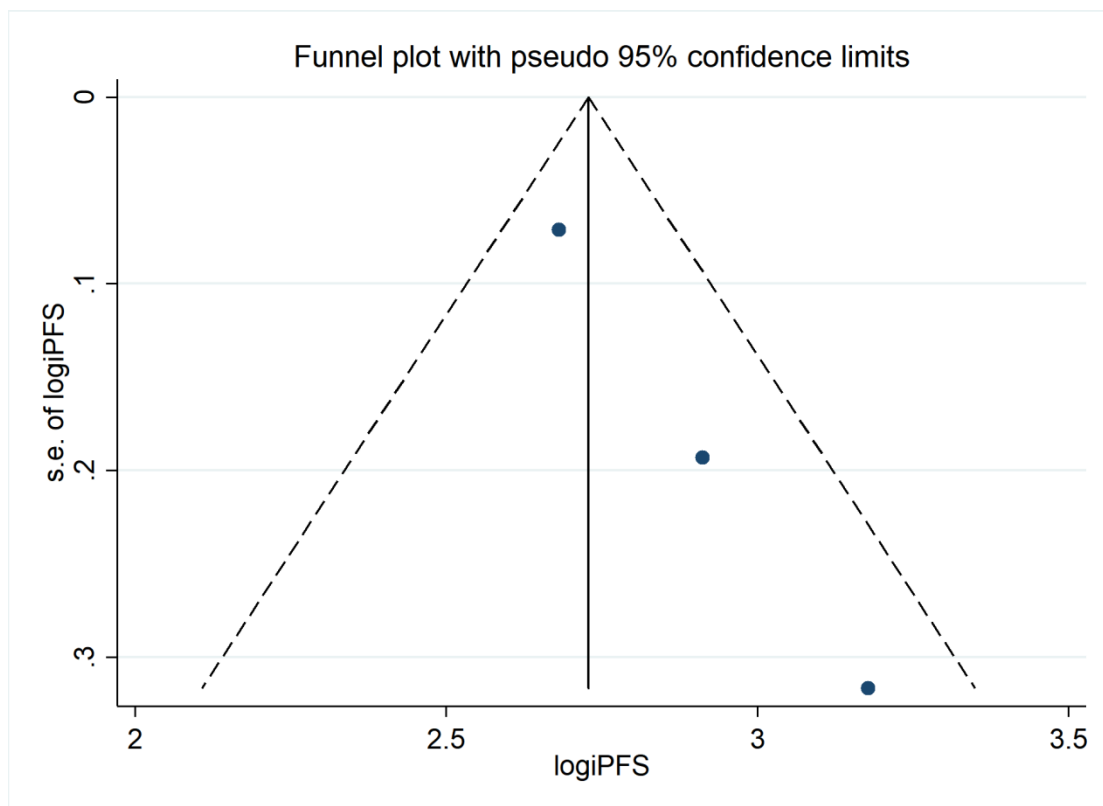

**Supplemental Figure 7.** A, Funnel plot of objective response rate (ORR); B, Funnel plot of disease

control rate (DCR); C, Funnel plot of progression free survival (PFS); D, Funnel plot of intracranial objective response rate (iORR); E, Funnel plot of intracranial progression free survival (iPFS).

**Supplemental Table 1.** Treatment line and number of patients for included studies.

| <b>Study</b>                      | <b>Treatment line</b>         | <b>Number of patients</b>              |
|-----------------------------------|-------------------------------|----------------------------------------|
| Camidge 2018 (phase I/II)         | 1L, 2L post-crizotinib        | 46                                     |
| Lin 2018                          | 2L post-alectinib             | 22                                     |
| Heredia 2020                      | ≥2L                           | 46                                     |
| Descourt 2021 (BrigALK2 study)    | ≥2L                           | 183                                    |
| Camidge 2021 (ALTA-1L)            | 1L                            | 137                                    |
| Nishio 2021 (J-ALTA)              | ≥2L post alectinib±crizotinib | 47                                     |
| Stinchcombe 2021<br>(NCT02706626) | ≥2L                           | 20                                     |
| Popat 2021                        | ≥2L                           | 104                                    |
| Gettinger 2021 (phase I/II)       | 1L, 2L post-crizotinib        | 28 (1L, n=3; 2L post-crizotinib, n=25) |
| Gettinger 2021 (ALTA)             | 2L post-crizotinib            | 110                                    |
| Kondo 2021 (J-ALTA)               | 1L                            | 32                                     |

**Supplemental Table 2.** Publication bias based on Begg's test and Egger's test

| <b>Comparisons</b> | <b>Begg's test</b> |          | <b>Egger's test</b> |          |
|--------------------|--------------------|----------|---------------------|----------|
|                    | <b>Z</b>           | <b>P</b> | <b>t</b>            | <b>P</b> |
| ORR                | 0.38               | 0.707    | -1.27               | 0.273    |
| iORR               | 1.70               | 0.089    | -2.64               | 0.118    |
| PFS                | 0.94               | 0.348    | -0.31               | 0.763    |
| iPFS               | 1.04               | 0.296    | 29.46               | 0.022    |
| DCR                | -0.34              | 1.000    | -0.09               | 0.938    |
